# Supplementary material for: Metabolic Pathways Involved in the Drought Stress Response of Nitraria tangutorum as Revealed by Transcriptome Analysis
Source: MDPI journal article supplement (doi:10.3390/f13040509), 2022-03-25
Supplement: s1 [file s1]

**Table S1.** RNA sequencing statistics. CK: normal watering. CK-1, CK-2, CK-3: three replications of normal watering. T: drought stress. T-1, T-2, T-3: three replications of drought stress. Raw reads (Rr): raw sequencing data. Clean reads (Cr): number of reads after culling low-quality reads, adaptors and ambiguous reads. Clean bases (Cb): number of sequenced sequences multiplied by its length, and converted to units of G. Error rate (Er): base error rate. Q20 and Q30: the ratio of bases with *Phred*-value > 20 and *Phred*-value 30 to the total number of bases, respectively. GC content: G and C ratio considering the all bases.

| Group | Rr         | Cr         | Cb (Gb) | Er (%) | Q20 (%) | Q30 (%) | GC (%) |
|-------|------------|------------|---------|--------|---------|---------|--------|
| CK-1  | 54,230,138 | 53,229,668 | 7.98    | 0.03   | 97.32   | 92.6    | 46.24  |
| CK-2  | 48,422,264 | 47,233,114 | 7.08    | 0.03   | 96.64   | 91.16   | 46.00  |
| CK-3  | 53,158,862 | 52,212,380 | 7.83    | 0.03   | 97.16   | 92.26   | 45.86  |
| T-1   | 50,790,984 | 49,932,386 | 7.49    | 0.03   | 97.3    | 92.6    | 45.78  |
| T-2   | 55,499,302 | 54,787,806 | 8.22    | 0.03   | 97.36   | 92.69   | 45.8   |
| T-3   | 64,926,978 | 63,723,460 | 9.56    | 0.03   | 97.66   | 93.35   | 45.62  |

**Table S2.** Lengths of transcripts and unigenes. N50/N90: The spliced transcripts were arranged from long to short according to length, then these spliced transcripts were accumulated until more than 50%/90% of the total length of the spliced transcripts , which was N50/N90.

|                   | Transcripts | Unigenes    |
|-------------------|-------------|-------------|
| Minimum length    | 201         | 201         |
| Mean length       | 966         | 1107        |
| Median length     | 615         | 789         |
| Maximum length    | 26,379      | 26,379      |
| N50               | 1554        | 1628        |
| N90               | 398         | 503         |
| Total nucleotides | 320,982,757 | 30,6097,014 |
| Total number      | 332,420     | 276,423     |
