# Supplementary material for: Metabolic Pathways Involved in the Drought Stress Response of Nitraria tangutorum as Revealed by Transcriptome Analysis
Source: MDPI journal article supplement (doi:10.3390/f13040509), 2022-03-25
Supplement: s1 [file s1]

Archive with 1 entries (1 files):
- forests-1641735-supplementary.pdf
